# Role of *X11* and *ubiquilin* as In Vivo Regulators of the Amyloid Precursor Protein in *Drosophila*

Garrett G. Gross<sup>1,3</sup>, R. M. Renny Feldman<sup>1,2,3\*</sup>, Atish Ganguly<sup>1,3</sup>, Jinhui Wang<sup>1,2b</sup>, Hong Yu<sup>1,2c</sup>, Ming Guo<sup>1,2,3\*</sup>

**1** Department of Neurology, The David Geffen School of Medicine, University of California Los Angeles, Los Angeles, California, United States of America, **2** Department of Pharmacology, The David Geffen School of Medicine, University of California Los Angeles, Los Angeles, California, United States of America, **3** Department of Brain Research Institute, The David Geffen School of Medicine, University of California Los Angeles, Los Angeles, California, United States of America

## Abstract

The Amyloid Precursor Protein (APP) undergoes sequential proteolytic cleavages through the action of  $\beta$ - and  $\gamma$ -secretase, which result in the generation of toxic  $\beta$ -amyloid ( $A\beta$ ) peptides and a C-terminal fragment consisting of the intracellular domain of APP (AICD). Mutations leading to increased APP levels or alterations in APP cleavage cause familial Alzheimer's disease (AD). Thus, identification of factors that regulate APP steady state levels and/or APP cleavage by  $\gamma$ -secretase is likely to provide insight into AD pathogenesis. Here, using transgenic flies that act as reporters for endogenous  $\gamma$ -secretase activity and/or APP levels (GAMAREP), and for the APP intracellular domain (AICDREP), we identified mutations in *X11L* and *ubiquilin* (*ubqn*) as genetic modifiers of APP. Human homologs of both *X11L* (*X11/Mint*) and *Ubqn* (*UBQLN1*) have been implicated in AD pathogenesis. In contrast to previous reports, we show that overexpression of *X11L* or human *X11* does not alter  $\gamma$ -secretase cleavage of APP or Notch, another  $\gamma$ -secretase substrate. Instead, expression of either *X11L* or human *X11* regulates APP at the level of the AICD, and this activity requires the phosphotyrosine binding (PTB) domain of *X11*. In contrast, *Ubqn* regulates the levels of APP: loss of *ubqn* function leads to a decrease in the steady state levels of APP, while increased *ubqn* expression results in an increase in APP levels. *Ubqn* physically binds to APP, an interaction that depends on its ubiquitin-associated (UBA) domain, suggesting that direct physical interactions may underlie *Ubqn*-dependent regulation of APP. Together, our studies identify *X11L* and *Ubqn* as in vivo regulators of APP. Since increased expression of *X11* attenuates  $A\beta$  production and/or secretion in APP transgenic mice, but does not act on  $\gamma$ -secretase directly, *X11* may represent an attractive therapeutic target for AD.

**Citation:** Gross GG, Feldman RMR, Ganguly A, Wang J, Yu H, et al. (2008) Role of *X11* and *ubiquilin* as In Vivo Regulators of the Amyloid Precursor Protein in *Drosophila*. PLoS ONE 3(6): e2495. doi:10.1371/journal.pone.0002495

**Editor:** Alfred Lewin, University of Florida, United States of America

**Received:** March 27, 2008; **Accepted:** May 5, 2008; **Published:** June 25, 2008

**Copyright:** © 2008 Gross et al. This is an open-access article distributed under the terms of the Creative Commons Attribution License, which permits unrestricted use, distribution, and reproduction in any medium, provided the original author and source are credited.

**Funding:** This work was supported by a UCLA Neurobehavioral Genetics training grant to R.M.R.F., as well as grants and funds from the National Institute of Health (RO1 and KO8), the Alfred P. Sloan Foundation, the Alzheimer's Association, the American Federation of Aging Foundation, the Larry L. Hillblom Foundation, the Glenn Family Foundation and the Ellison Medical Foundation to M.G.

**Competing Interests:** The authors have declared that no competing interests exist.

\* E-mail: mingfly@ucla.edu

<sup>‡a</sup> Current address: Gevo Inc., Englewood, Colorado, United States of America

<sup>‡b</sup> Current address: Children's Hospital of Philadelphia, Philadelphia, Pennsylvania, United States of America

<sup>‡c</sup> Current address: Rainbow Transgenic Flies Inc., Newbury Park, California, United States of America

‡ These authors contributed equally to this work.

## Introduction

One of the pathological hallmarks of Alzheimer's disease (AD) is the accumulation of amyloid plaques consisting of toxic  $\beta$ -amyloid ( $A\beta$ ) peptides. These peptides arise from the sequential cleavage of the Amyloid Precursor Protein (APP), a type I transmembrane protein, by two proteases known as  $\beta$ - and  $\gamma$ -secretase (Fig. 1A). APP proteolysis by  $\beta$ -secretase generates an APP C-terminal fragment (CTF) known as C99. Subsequent cleavage of C99 by  $\gamma$ -secretase results in the release of  $A\beta$  into the lumen and the APP intracellular domain (AICD) into the cytosol, where it can contribute to a transcriptional regulatory complex [1]. In addition to this amyloidogenic pathway, APP can also undergo non-amyloidogenic processing via sequential cleavage by  $\alpha$ - and  $\gamma$ -secretase (Fig. 1A).  $\alpha$ -secretase cleaves within the  $A\beta$  sequence, thereby precluding the formation of  $A\beta$ .  $\alpha$ -cleavage produces an

APP CTF known as C83, which also serves as a substrate for  $\gamma$ -secretase activity [1].

$\gamma$ -secretase activity resides in a multi-protein complex that minimally contains Presenilins, Nicastrin, Aph-1 and Pen-2 [2,3]. Mutations in APP, Presenilin 1 and Presenilin 2 cause familial, early onset AD [4–7]. In addition, the triplication of the APP locus as well as promoter mutations in APP that increase APP expression are associated with AD [8,9]. The function of the AICD may also be crucial for AD pathogenesis, since each time  $A\beta$  is generated, AICD is simultaneously released. AICD, in conjunction with two PTB domain-containing proteins (Fe65 and Tip60), can enter the nucleus and regulate the transcription of target genes, including APP itself [10]. In addition, AICD has also been implicated in other processes including cell signaling, apoptosis and calcium homeostasis [11–21]. Therefore, identifying genes that regulate APP steady-state levels, APP cleavage, and the

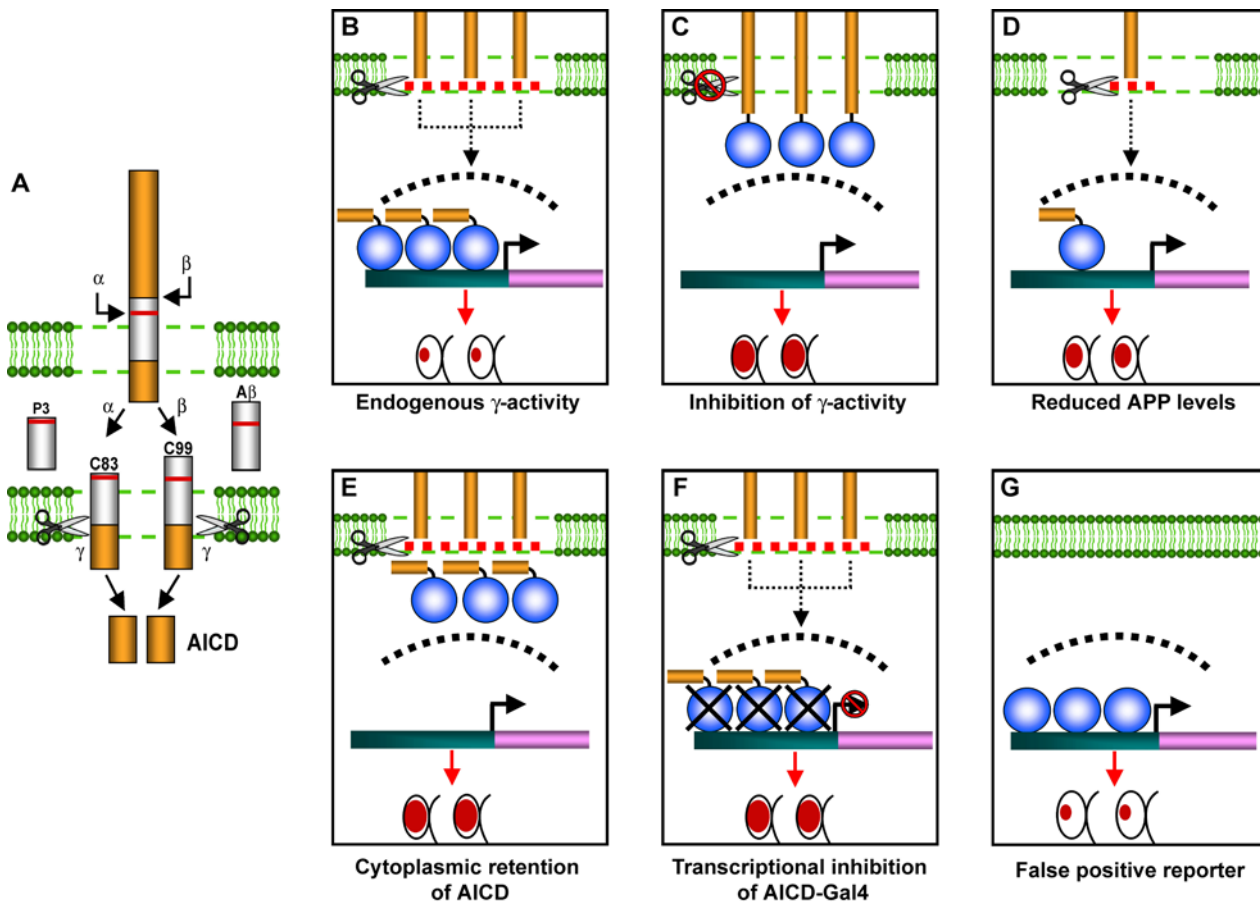

**Figure 1. Schematics depicting sites of APP cleavage and GAMAREP.** (A) The sequential actions of either  $\alpha$ -secretase or  $\beta$ -secretase, which cleaves APP in its extracellular domain, and  $\gamma$ -secretase, which cleaves APP within its transmembrane domain, generate AICD and C83 or C99, respectively.  $\alpha$ -secretase cleaves APP within the sequence of A $\beta$ , thus precluding the generation of A $\beta$ . (B) GAMAREP (GMR-C99-Gal4, UAS-grim) contains two components: First, C99-Gal4, a chimeric protein with an N-terminal cleavable signal sequence, transmembrane and intracellular domain (yellow bar) and a C-terminal Gal4 (blue circle) is specifically expressed in the eye and is a substrate for  $\gamma$ -secretase. Second, Grim (purple bar) is expressed under the control of a Gal4-dependent promoter (green bar) as a readout. In the presence of endogenous  $\gamma$ -secretase activity (scissor), the unleashed AICD-Gal4 (yellow bar and blue circle fragment) translocates to the nucleus (dashed curve) and binds to the UAS element and activates (black arrow pointing to the right) Grim expression. This leads to apoptosis in the eye, resulting in flies with small and rough eyes (red ovals depict relative eye size). (C) In the absence of  $\gamma$ -cleavage, Gal4 remains tethered at the membrane and therefore is unable to activate Grim expression. This results in flies with increased eye size (i.e., suppression of GAMAREP phenotype). (D) When APP (C99) levels are downregulated, fewer substrate molecules are available (illustrated as one C99 molecule rather than three in B) to activate Grim-dependent apoptosis. This results in larger (suppressed) eye size. (E) When AICD is retained in the cytoplasm, or its levels or function are reduced (not illustrated here), apoptosis occurs less efficiently and the eyes remain large. (F) When AICD-Gal4 mediated transcription is inhibited, apoptosis is also reduced, resulting in flies with larger (suppressed) eyes. In summary, GAMAREP allows the identification of factors that regulate endogenous  $\gamma$ -secretase activity (as in C), as well as factors that regulate APP steady state levels (as in D), and AICD function, stability and/or cytoplasmic retention (as in E and F). (G) The false positive reporter. Suppression of GAMAREP can also arise from factors that regulate processes other than APP biology, such as mutations modifying GMR- or Gal4-dependent transcriptional activation, or apoptosis, which we collectively named false positives. To eliminate these factors, we employed a “false positive” reporter (GMR-Gal4, UAS-apoptotic gene). True modifiers are those that modify they eye phenotypes of GAMAREP, but not those of the false positive reporter.  
doi:10.1371/journal.pone.0002495.g001

fate and activity of AICD are likely to further our understanding of AD pathogenesis.

The X11/Mint protein family consists of three mammalian members: X11 $\alpha$  and X11 $\beta$ , which are expressed in neurons, and X11 $\gamma$  which is ubiquitously expressed. All three X11 proteins contain a phosphotyrosine binding (PTB) domain, followed by two PSD95/Dlg/ZO-1 (PDZ) domains [22]. Several observations suggest links between X11 and AD. First, X11 $\alpha$  and X11 $\beta$  have been found in amyloid plaques in post-mortem AD brains [23,24]. Second, increased X11 $\alpha$  and X11 $\beta$  expression in mammalian cells leads to a reduced secretion of extracellular A $\beta$  [25–27], while transgenic mice expressing either X11 $\alpha$  or X11 $\beta$  are associated with

reduced levels of A $\beta$  [28,29]. Third, X11 proteins physically interact with AICD via their PTB domains [30,31] and inhibit AICD-dependent transcription [32]. Fourth, X11 $\alpha$  and X11 $\beta$  overexpression increases APP steady-state levels both *in vitro* and *in vivo*, likely due to altered maturation in the secretory pathway or endocytic trafficking of APP [25,27,33,34]. Finally, the X11 proteins bind to presenilin via their PDZ domains [35]. Furthermore, X11 $\alpha$  and X11 $\beta$  have been reported to modulate  $\gamma$ -secretase in mammalian cells [36]; however, alterations in the levels of C83 and C99 are not observed in transgenic mice overexpressing X11 [29]. These conflicting observations leave it unclear whether X11 overexpression can regulate  $\gamma$ -secretase activity.

*Ubiquilin 1 (UBQLN1)* is another gene that has been linked to AD. *UBQLN1* encodes a protein with ubiquitin-like (UBL) and ubiquitin-associated (UBA) domains, as well as St1 repeats [37], which are often associated with chaperone activity [38]. Several studies suggest links between *UBQLN1* and AD. First, in post-mortem AD brains, *UBQLN1* is found in neurofibrillary tangles [37], a pathological hallmark of AD along with amyloid plaques [1]. Second, the genomic region containing *UBQLN1*, 9q22, has been identified as containing one major candidate gene for conferring a predisposition to late onset AD [39,40]. Some reports [41,42], but not others [43–46], suggest that genetic variants in the *UBQLN1* gene, including one known as *UBQ-8i* that deletes one St1 repeat, are associated with increased risk for the more prevalent late-onset forms of AD. Further evidence that *UBQ-8i* has enhanced toxicity comes from studies in *Drosophila* demonstrating that expression of human *UBQ-8i* in flies leads to earlier onset and more severe eye degeneration than does expression of wildtype human *UBQLN1* [47]. Third, *UBQLN1* binds PS1 and PS2 [37], and the fly homolog of Presenilin binds to both human and fly Ubiquilin (Ubqn), respectively [47]. *Drosophila ubqn* antagonizes *presenilin (psn)* function in both loss-of-function and gain-of-function studies during development and adult-onset neurodegeneration in vivo [47,48]. Finally, in cultured cells, downregulation of *UBQLN1* expression alters APP levels and A $\beta$  secretion by modulating APP trafficking [49]. However, reports of altered *UBQLN1* expression on APP processing are conflicting [48–50]. Because increases in APP levels and/or altered APP processing are likely to be important risk factors for AD, it is crucial to clarify the effect of *UBQLN1* on APP in an in vivo system. Additionally, since both X11 and *UBQLN1* have been implicated as regulators of APP steady state levels and APP processing, it is crucial to assess the extent to which each molecule contributes to the myriad regulations of APP-related processes, and to determine what their net effect is in vivo.

*Drosophila melanogaster* is a useful model organism for studying neurodegenerative diseases and AD-related processes [51–54]. *Drosophila* contains homologs of APP [55] and all four components of the  $\gamma$ -secretase complex [56,57]. Expression of human APP in *Drosophila* results in its cleavage by endogenous  $\alpha$ - and  $\gamma$ -secretase activities [58,59]. Furthermore, co-expression of human  $\beta$ -secretase (BACE1) and human APP fully reconstitutes APP  $\beta$ -cleavage [60]. In addition, *Drosophila* contains homologs of X11/Mint family proteins [22,61] and *UBQLN1* with evolutionarily conserved domain architecture [47,48].

We engineered transgenic flies that act as living reporters for  $\gamma$ -secretase activity in the eye [59] (Fig 1B–F). These flies (GMR-C99-Gal4, UAS-*grim*), known as gamma-secretase activity and APP level reporters (hereafter called GAMAREP), express a chimeric protein which contains a signal sequence, followed by a fusion of the C99 fragment of APP to the yeast transcription factor Gal4. This C99-Gal4 protein is expressed specifically in the developing eye in the presence of a Gal4 responsive element that drives an apoptosis-inducing gene known as *grim* [62,63]. In the presence of endogenous  $\gamma$ -secretase activity (Fig. 1B), AICD-Gal4 is liberated from the membrane, migrates to the nucleus and activates transcription of *grim*. The resulting apoptosis generates flies with small and rough eyes [59]. When  $\gamma$ -secretase activity is impaired (Fig. 1C), Gal4 remains tethered to the membrane, resulting in less apoptosis. Therefore, the size and roughness of the eye inversely correlates, in a semi-quantitative manner, with the level of endogenous  $\gamma$ -secretase activity (high levels of activity results in flies with small eyes while low levels are associated with nearly normal eyes). These flies act as sensitive reporters for modest changes (two-fold) in the levels of known  $\gamma$ -secretase

components [59]. Though originally intended to identify regulators of  $\gamma$ -secretase activity [59], the eye phenotypes of GAMAREP flies are also expected to be sensitive to genetic perturbations that alter the levels of APP (Fig. 1D), AICD function, and/or the transcriptional activity of AICD-Gal4 (Fig. 1E, F). To discriminate factors that regulate transgene expression levels, Gal4-dependent transcriptional efficiency or apoptosis, we also generated a false positive reporter (GMR-Gal4, UAS-apoptotic gene) (Fig. 1G). True modifiers will be identified as factors that modify only GAMAREP eye phenotypes, and not those of the false positive reporter. Here we report the identification of *X11L* and *ubqn* as regulators of APP in *Drosophila*.

## Results

### Increased expression of *X11L* suppresses GAMAREP eye phenotypes

We carried out a genetic screen (to be described in detail elsewhere) in which GAMAREP flies were crossed with flies carrying single insertions of the EP P element on the X chromosome. EP elements carry a Gal4 responsive promoter pointing outwards from the end of the transposon. Thus, when inserted near the 5' end of a gene, EP elements can drive nearby gene overexpression in a Gal4 dependent manner. From this screen, we identified one suppressor line, which contains an EP element insertion in the 5' region of the *X11L* gene (CG5675) (Fig. 2A). To confirm that the GAMAREP suppression is due to overexpression of *X11L*, we showed that eye-specific overexpression of *X11L* (GMR-*X11L*) (Fig. 2E) indeed suppressed the GAMAREP small eye phenotype (Fig. 2F compared to C). *X11L* overexpression was confirmed using anti-X11L antibodies (Supplementary Fig. S1). Importantly, *X11L* overexpression had no effect on the small eye phenotypes of flies expressing apoptosis-inducing genes under the direct control of GMR-Gal4 (false positive reporters; [59]) (Fig. 2G compared to D), indicating that X11L acts specifically on C99, not on GAL4 or apoptotic genes.

To demonstrate that the mechanism we uncovered for *X11L* is shared by human *X11 $\alpha$* , we expressed human *X11 $\alpha$*  specifically in the fly eye (Fig. 2H). Strikingly, expression of human *X11 $\alpha$*  also suppressed the small eye phenotype of GAMAREP (Fig. 2I), but not that of the false positive reporter (Fig. 2J). This suggests that *Drosophila X11L* and human *X11 $\alpha$*  show functional conservation and that mechanisms of action discovered in flies are likely to be relevant to humans.

### *X11L* overexpression regulates APP at the level of AICD

To determine how increased *X11L* expression regulates APP in the GAMAREP system, we established assays for APP levels and cleavage in *Drosophila*. Full length human APP (APP<sub>695</sub>) or C99 was myc-tagged at the C-terminus and expressed in the eye. Tissue lysates were examined by Western blotting with an anti-Myc antibody to follow the fate of APP (Fig. 3A) or C99 (Fig. 3B). APP-Myc or C99-Myc was cleaved by endogenous  $\alpha$ - and  $\gamma$ -secretase in both systems, yielding an AICD-Myc fragment ( $\gamma$ -secretase cleaved) and C83 (an  $\alpha$ -secretase cleaved fragment) (Fig. 3A and 3B). Furthermore, although no endogenous BACE activity has been definitively demonstrated in *Drosophila*, expression of human BACE in the presence of APP resulted in the generation of C99, in addition to C83 and AICD (Fig. 2C). RNAi-mediated silencing of any one of the four components of the  $\gamma$ -secretase complex, *psn*, *nct*, *aph-1* or *pen-2*, resulted in attenuated AICD generation and an increase in the levels of CTFs ( $\gamma$ -secretase substrates) (Fig. 3A and 3B). In addition, overexpression of a dominant negative form of

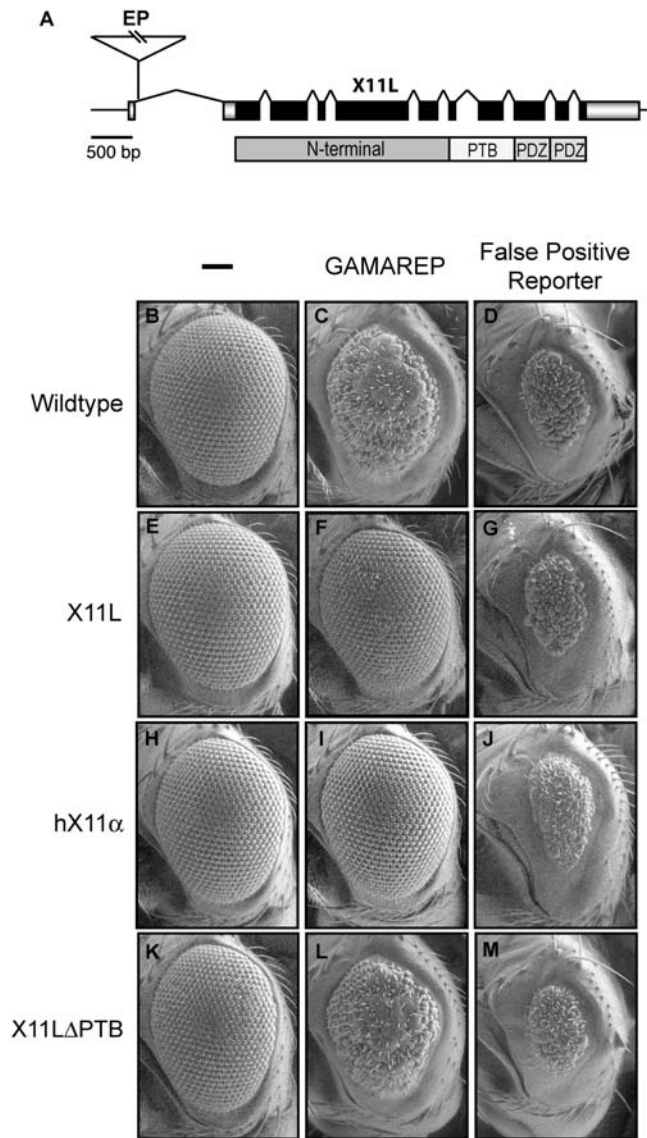

**Figure 2. Overexpression of fly *X11L* or human *X11α* specifically suppresses GAMAREP.** (A) Genomic map of *Drosophila X11L* (CG5675, cytological location 16B7). The P element insertion (triangle), *X11L* coding and the untranslated regions (dark and shaded rectangles, respectively) are illustrated. *X11L* encodes a protein with a PTB and two PDZ domains that are conserved in human X11 proteins. (B–M) Scanning electron micrographs (SEM) of adult fly eyes of various genotypes. GAMAREP flies exhibit small, rough eyes (C) as compared to the wildtype (B). Overexpression of *X11L* (GMR-*X11L*) shows no external eye phenotypes (E), but strongly suppresses GAMAREP eye phenotypes (F). Expression of human *X11α* (GMR-*X11α*), which by itself does not produce any visible eye phenotypes (H), suppresses GAMAREP phenotypes as effectively as fly *X11L* overexpression (I). *X11L*'s ability to suppress GAMAREP is dependent on its PTB domain, since overexpression of *X11LΔPTB* (GMR-*X11LΔPTB*) (K) fails to suppress GAMAREP eye phenotype (L). The ability of X11 to suppress GAMAREP eye phenotype is specific, since overexpression of X11L, X11LΔPTB or human X11 fails to suppress the eye phenotype of the false-positive reporter (GMR-Gal4, UAS-*grim/reaper*) (D, G, J and M). The *X11LΔPTB* transgene expresses a truncated protein as detected by anti-X11L antibodies [75]. Of note, strong overexpression of *X11L* (multiple copies of GMR-*X11L* or GMR-Gal4, UAS-*X11L*) can result in a rough eye phenotype (data not shown), consistent with previous reports [76]. doi:10.1371/journal.pone.0002495.g002

psn (Psn<sup>D279A</sup> which corresponds to human PS1<sup>D257A</sup> [59]) resulted in similar effects on APP processing (Fig. 3C and E).

Since human X11 $\alpha$  has previously been shown to bind Presenilin and regulate  $\gamma$ -secretase-mediated cleavage in mammalian cells [35], we asked if *Drosophila X11L* overexpression suppressed GAMAREP by inhibiting  $\gamma$ -secretase activity. We crossed flies overexpressing *X11L* with flies expressing APP-Myc, and their progeny were subjected to Western blot analysis. In contrast to what was observed for the knockdown of *psn*, *nicastrin* (*nct*), *aph-1* or *pen-2* function, we did not see any reduction in AICD levels or any CTF accumulation (Fig. 3C and D). Similarly, flies overexpressing *X11L* in the background of C99-Myc expression also failed to show any evidence of  $\gamma$ -secretase inhibition (Fig. 3E). These results suggest that the predominant effect of *X11L* overexpression in vivo is not due to  $\gamma$ -secretase inhibition.

With increased expression of *X11L* (multiple copies of transgenes), we observed a slight increase in the steady-state levels of APP (data not shown), which is consistent with reported findings in mammals [25,27,33,34]. However, full-length APP and its proteolytic fragments increased largely in proportion. The slight increase in levels of AICD is likely to be physiologically inconsequential, since elevated levels of AICD are predicted to enhance the GAMAREP eye phenotype, whereas we observed a robust suppression.

To explore if *X11L* overexpression regulates AICD function independently of  $\gamma$ -secretase regulation, we generated transgenic flies that overexpressed a fusion protein of the AICD and Gal4 specifically in the eye (GMR-AICD-Gal4). Flies carrying both GMR-AICD-Gal4 and UAS-*hid* transgenes (Fig. 4A and 4E, hereafter called the AICDREP) were viable but exhibited an almost complete absence of eye tissue, due to extensive apoptosis of the cells in the eye [62–64]. This AICDREP (Fig. 4E) displayed a much smaller eye size than that of GAMAREP (Fig. 2C), presumably because in the AICDREP, Gal4 is not tethered to the membrane as compared to C99-Gal4, and therefore does not require any liberation by  $\gamma$ -secretase. The AICDREP thus serves as a useful system to identify genes that regulate AICD function in vivo (Fig. 4B–D). Remarkably, overexpression of *X11L* in the presence of AICDREP almost completely restored the eye size to wildtype (Fig. 4F). This suggests that the major effect of *X11L* overexpression is the  $\gamma$ -secretase independent inhibition of AICD. In addition, expression of human *X11α* suppressed the AICDREP as effectively as overexpression of *X11L* (Fig. 4H), indicating functional conservation between *Drosophila* and human *X11*.

Mammalian X11 $\alpha$  has been shown to bind to the AICD via its PTB domain [30,31]. If X11L overexpression exerts its major effect on AICD, we would expect that expression of a truncated X11L lacking its PTB domain (X11LΔPTB) should no longer be able to suppress the GAMAREP or AICDREP phenotypes. Indeed, eye-specific overexpression of X11LΔPTB (Fig. 2K) failed to suppress both GAMAREP and the AICDREP (Fig. 2L and 4G), further supporting the hypothesis that X11L regulates AICD function. Importantly, neither overexpression of X11L, X11LΔPTB nor human X11 $\alpha$  affected the GMR-Gal4, UAS-*hid* eye phenotype (Fig. 4I–L), suggesting that X11 expression acts specifically on AICD. Furthermore, the expression of X11L or X11 $\alpha$  did not affect AICD steady-state levels (Fig. 4M), suggesting that X11 may promote cytoplasmic retention of AICD, or inhibit its ability to regulate transcription.

#### *X11L* overexpression does not affect the $\gamma$ -secretase mediated cleavage of Notch

Our observation that overexpression of fly and human *X11* does not alter  $\gamma$ -secretase mediated cleavage of APP stands in contrast to a previous report [36]. To explore this issue further, we asked

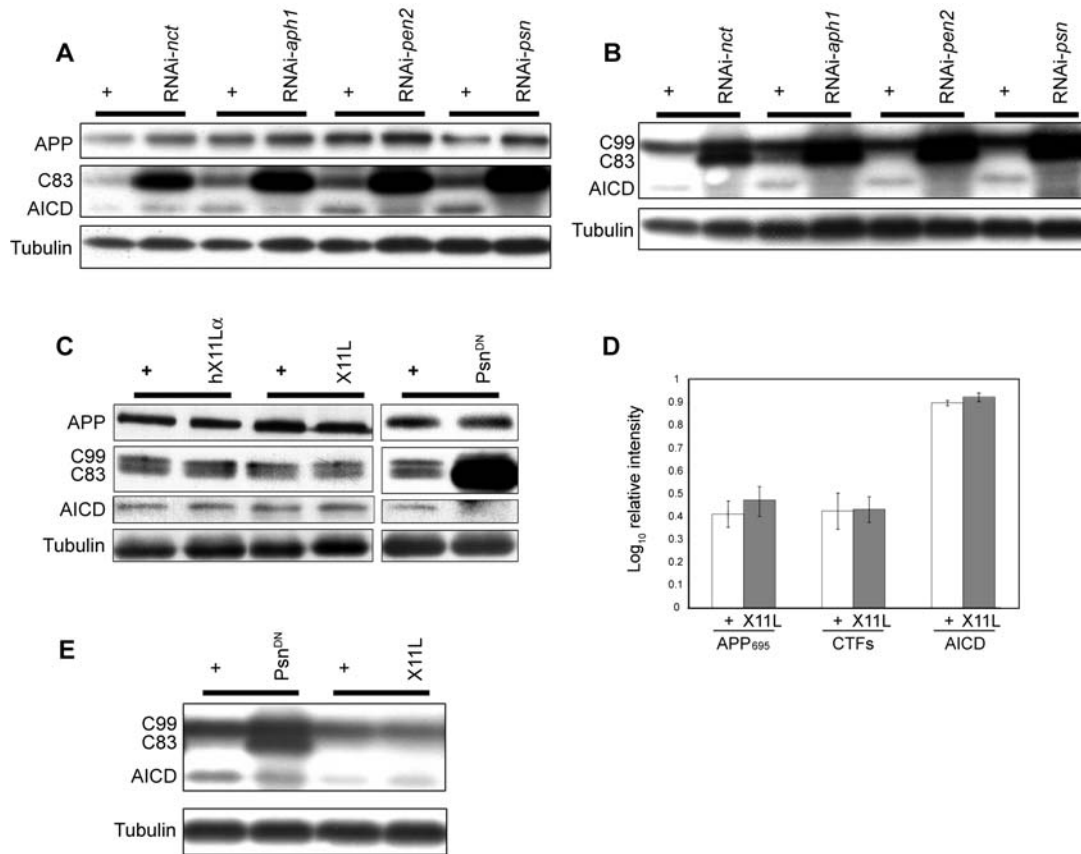

**Figure 3. X11L overexpression does not alter APP levels or processing.** (A–C, E) Western blotting of adult head lysates from various transgenic flies. (A) When APP-9Myc is expressed, the endogenous  $\alpha$ - and  $\gamma$ -secretase mediated cleavages generate C83 and AICD, respectively. RNAi knockdown of any one of the four components of the  $\gamma$ -secretase complex results in reduction of AICD levels and an increase in the levels of C83, as compared with sibling controls. (B) When C99-9Myc is expressed, the endogenous  $\gamma$ -cleavage generates AICD. RNAi knockdown of any one of the four  $\gamma$ -secretase components results in a reduction in AICD levels and a simultaneous increase in levels of the CTFs. (C) Co-expression of human BACE and APP-9Myc generates C83, C99 and AICD. Overexpression of Psn<sup>DN</sup> results in a reduction of AICD and an increase in the levels of  $\gamma$ -secretase substrates (C83 and C99). In contrast, expression of neither X11L nor human X11 $\alpha$  results in any alteration in the CTF levels. (D) Western blot quantifications of APP and its fragments suggest that there are no significant differences in the levels of either full length APP or its fragments as compared to control. Values are normalized to the corresponding tubulin loading controls. Data from X11 overexpression (dark bars) and control (white bars) are analyzed by paired t-test. (E) When C99-9Myc is expressed, expression of Psn<sup>DN</sup> results in a decrease in AICD levels and an increase in C83 levels, while overexpression of X11L fails to show any changes. Note that panels depicting CTFs are from the same Western blots exposed for different lengths of time than the corresponding APP panels. For each sample, sibling flies of the appropriate genotype raised under identical conditions were used as controls, and are shown immediately adjacent to the corresponding experimental sample (linked by a horizontal bar). doi:10.1371/journal.pone.0002495.g003

whether X11L overexpression could regulate  $\gamma$ -cleavage of Notch, another substrate of  $\gamma$ -secretase. Notch is a transmembrane receptor that mediates cell-cell communication events in multiple developmental contexts [65,66]. Following cleavage of its extracellular domain (the S2 cleavage), Notch requires  $\gamma$ -secretase-mediated cleavage (denoted S3) to release the Notch intracellular domain (NICD), and activate downstream signaling events [67]. To analyze Notch processing, a transmembrane version of Notch representing the S2 cleaved fragment was Myc-tagged at its C-terminus and specifically expressed in the fly eye. Silencing of any one of the four  $\gamma$ -secretase components led to decreased  $\gamma$ -cleavage of Notch, as demonstrated by decreased levels of NICD, and an increase in the levels of uncleaved Notch (Fig. 5A). Overexpression of Psn<sup>D279A</sup> also caused reduced levels of NICD and an accumulation of uncleaved Notch (Fig. 5B). In contrast, neither X11L overexpression nor expression of human X11 $\alpha$  led to any significant effects on NICD production (Fig. 5B).

To further test the hypothesis that overexpression of X11L does not affect  $\gamma$ -secretase activity, we searched for a genetic

interactions between X11L and *psn* in vivo. RNAi-mediated silencing of *psn* specifically in the eye (GMR-RNAi-*psn*) resulted in flies with small, rough eyes (Fig. 5C). This is likely due to impaired cleavage of Notch since partial loss of *Notch* function also results in small, rough eyes [68]. As expected, overexpression of *psn* partially suppressed the rough eye phenotype associated with GMR-RNAi-*psn*, while expression of Psn<sup>D279A</sup> enhanced this phenotype (data not shown). In contrast, expression of either *Drosophila* X11L or human X11 did not result in enhancement of the GMR-RNAi-*psn* eye phenotype (Fig. 5D and 5E), suggesting that overexpression of X11L does not significantly inhibit  $\gamma$ -secretase activity in vivo.

#### *ubqn* acts to stabilize the steady-state levels of APP

To study *ubqn* function in *Drosophila*, we generated two RNAi constructs targeted to two independent regions of *ubqn* (the coding region and the 3'-untranslated region, respectively), and used these transgenic flies to carry out tissue-specific silencing [47]. As described previously, ubiquitous expression of RNAi-*ubqn* resulted in a loss of detectable Ubqn protein [47]. Both *ubqn* RNAi

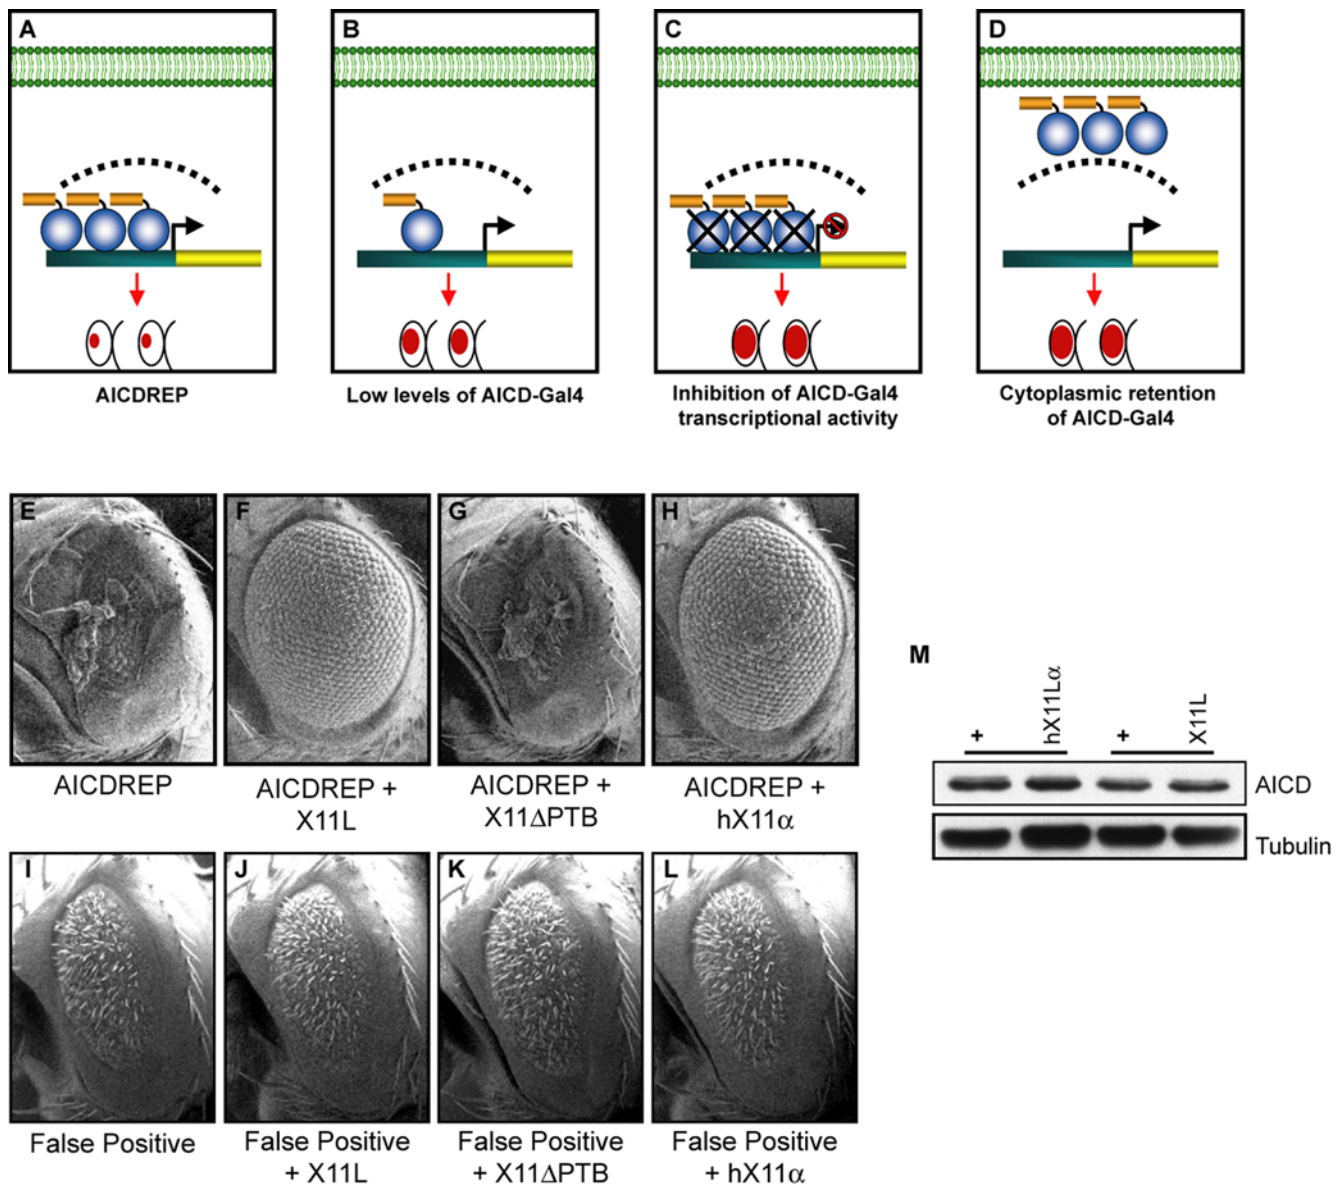

**Figure 4. X11L overexpression suppresses the AICDREP.** (A–D) Schematic illustration of the AICDREP. (A) AICDREP (GMR-AICD-Gal4, UAS-*hid*) is composed of two transgenic components. One expresses a fusion protein (AICD-Gal4) (yellow bar connected to blue circle) specifically in the eye. The other expresses the apoptotic gene *hid* (yellow bar) under the control of the UAS promoter (green bar). The AICDREP flies exhibit almost no eye, due to extensive apoptosis. The AICDREP serves as a useful system to identify genes that regulate AICD levels (B), transcriptional activity (C), as well as AICD cytoplasmic retention (D) in vivo. False positive modifiers such as factors regulating the expression levels of transgenes, Gal4's ability to activate transcription, or apoptosis can be excluded using GMR-Gal4, UAS-*hid* (I). (E–L) SEMs of adult fly eye of various genotypes. (E) The AICD reporter flies exhibit an almost total lack of ommatidia. (F) Overexpression of *X11L* results in a dramatic suppression of the AICDREP and restores the eye to nearly wildtype. (G) Overexpression of *X11ΔPTB* fails to suppress the AICDREP phenotype. (H) Expression of human *X11α* also demonstrates dramatic rescue of the AICDREP eye phenotype. (I–L) Overexpression of *X11L*, *X11ΔPTB* or human *X11α* does not affect the eye phenotype of GMR-Gal4, UAS-*hid* transgene. (M) Western Blotting of adult head lysates. Neither *X11L* overexpression nor *X11α* expression alters AICD levels. Each experimental and its relevant control samples are linked by a horizontal line.  
doi:10.1371/journal.pone.0002495.g004

transgenes silenced *ubqn* expression to similar levels and gave identical phenotypes in all experiments [47]. Using the same RNAi hairpins, we carried out eye-specific silencing of *ubqn* (GMR-RNAi-*ubqn*); effects confirmed by Western blotting of head lysates using anti-Ubqn antibodies (Supplementary Fig. S1). Though silencing of *ubqn* function did not lead to any overt developmental phenotypes (Fig. 6C), it strongly suppressed the GAMAREP phenotype (Fig. 6B compared with 6A). Importantly, silencing of *ubqn* did not alter the false positive reporter eye

phenotypes (Fig. 6D compared with 2D), suggesting that the suppression of GAMAREP was specifically due to an effect on C99.

We next investigated how *ubqn* loss-of-function suppressed GAMAREP. APP-Myc was co-expressed with human BACE in the eye. Silencing of *ubqn* resulted in a reduction of steady state levels of full length APP as well as its proteolytic fragments (C99, C83 and AICD) in the eye (Fig. 6G). Importantly, the reduction of full length APP and its cleaved forms occurred largely propor-

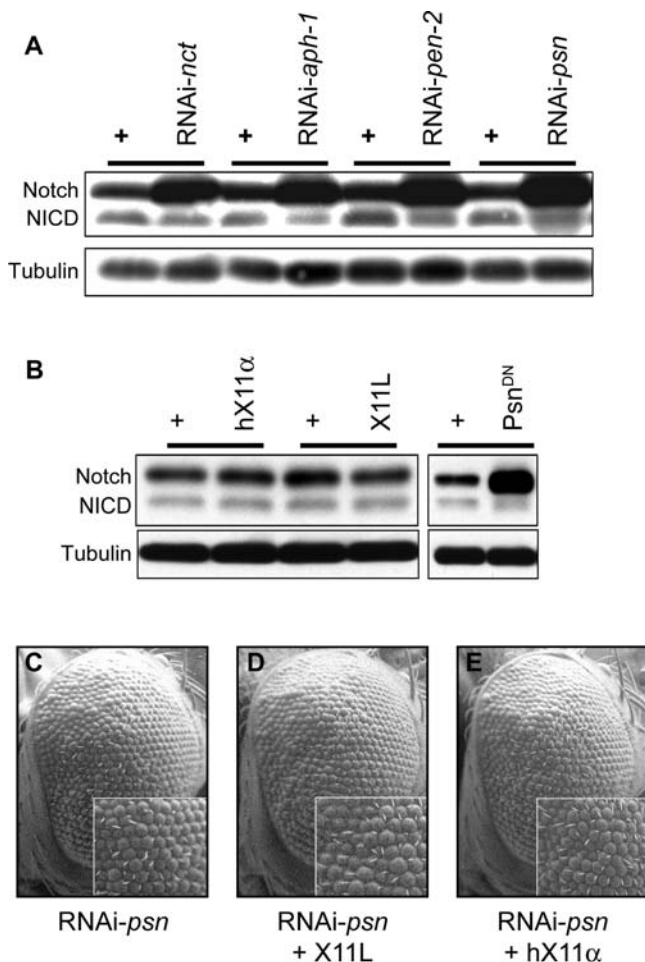

**Figure 5. X11L overexpression does not regulate the effect of  $\gamma$ -secretase activity on Notch.** (A–B) Western blotting of adult head lysates from various transgenic flies expressing the S2-cleaved Notch fragment (a  $\gamma$ -secretase substrate). (A) Eye-specific silencing of any of the four component of the  $\gamma$ -secretase complex results in a reduction of NICD levels and an increase in the levels of uncleaved Notch. (B) Overexpression of either *X11L* or human *X11 $\alpha$*  fails to alter S2-cleaved Notch levels or NICD levels, in contrast to expression of *Psn<sup>DN</sup>*. (C–E) SEMs of adult fly eyes of various genotypes. Eye-specific expression of either *Drosophila X11L* (D) or human *X11 $\alpha$*  (E) does not modify the eye phenotype due to eye-specific knockdown of *psn* (C). Insets show a close-up view of the ommatidia.  
doi:10.1371/journal.pone.0002495.g005

tionately (Fig. 6G), suggesting that loss of *ubqn* leads to a decrease in the overall steady-state levels of APP, not a decrease in the activity of any particular secretase.

Since silencing of *ubqn* resulted in a decrease in AICD levels as a consequence of reduced APP levels, we asked if silencing *ubqn* would also affect the AICD reporter eye phenotypes. RNAi-*ubqn* flies were crossed to flies overexpressing Myc-tagged AICD. Indeed, we observed that eye-specific expression of RNAi-*ubqn* led to a modest suppression of the AICDREP (Fig. 6F compared with 6E), and a reduction in AICD levels in vivo (Fig. 6H).

To determine if *ubqn* acts as a dose-dependent regulator of APP levels, we examined the consequences of *ubqn* overexpression on APP levels. Eye-specific overexpression of *ubqn* (*GMR-ubqn*) did not generate any overt eye phenotypes, or suppress the GAMAREP eye phenotypes (data not shown). Expression levels of *ubqn* overexpression was confirmed by anti-Ubqn antibodies (Supple-

mentary Fig. S1). However, *ubqn* overexpression (*GMR-Gal4*, *UAS-ubqn*) led to an increase in APP levels (Fig. 6I). As with silencing of *ubqn*, *ubqn* overexpression increased the steady state levels of the full length and  $\gamma$ -secretase cleaved fragments of APP largely in proportion, suggesting that perturbation of Ubqn levels does not affect  $\gamma$ -cleavage of APP (Fig. 6I). Together, we concluded that the suppression of the GAMAREP phenotype caused by loss of *ubqn* function is most likely the result of a decrease in APP steady-state levels. While loss of *ubqn* strongly suppressed the GAMAREP phenotype, we did not observe a significant enhancement of GAMAREP upon *ubqn* overexpression. This is most likely due to the fact that our GAMAREP reporter is much less sensitive in detecting enhancers than suppressors. This is based on multiple screens carried out to identify modifiers of GAMAREP, from which we isolated a dozen GAMAREP suppressors but no enhancers (unpublished observations).

How Ubqn regulates APP levels is unclear, but could involve direct interactions between these proteins. To explore this hypothesis, we asked if Ubqn can bind to APP directly. We mixed purified GST and GST-Ubqn fusion proteins with lysates from Schneider 2 (S2) cells transfected with Myc-tagged C99. Indeed, Myc-C99 specifically bound GST-Ubqn, but not GST alone (Fig. 6J). Interestingly, in addition to native-sized C99, GST-Ubqn preferentially bound to high molecular weight products, which are likely polyubiquitinated forms of C99 (Fig. 6J). Deletion of the UBA domain, but not the UBL domain, significantly abrogated the interaction between Ubqn and C99 (Fig. 6J), indicating that the UBA domain is required for this interaction.

## Discussion

Here, we report the identification of two APP regulators, X11L and Ubqn, using a living reporter, GAMAREP. GAMAREP allows us to effectively identify regulators of  $\gamma$ -secretase activity, APP steady-state levels and/or AICD function. Both the steady-state levels and the processing of APP have been demonstrated to be important in the pathogenesis of AD. However, the function of AICD, a much less studied APP fragment, may also be crucial for AD pathogenesis, since AICD is generated along with A $\beta$  and may have functions including transcriptional regulation, signaling, apoptosis and calcium homeostasis. Importantly, when a protein regulates multiple aspects of APP, either directly or indirectly, the combination of GAMAREP, AICDREP, and our in vivo cleavage assays allows us to uncover the relative contributions of these regulatory inputs. This is of particular relevance in this study since both X11 and UBQLN1 have been proposed to have multiple functions affecting myriad pathways in various systems. Therefore, it is important to determine in vivo which pathways play predominant roles in events related to AD pathogenesis. Our data suggest that the predominant role of X11L is to regulate APP at the level of the AICD by a process requiring its PTB domain, whereas the major role of Ubqn is to regulate APP levels, likely through a direct physical interaction with APP that is dependent on the UBA domain of Ubqn.

As a modifier of AICDREP, X11L does not regulate AICD levels. Following  $\gamma$ -cleavage, AICD is thought to migrate into the nucleus. It is likely that *X11L* overexpression causes cytoplasmic retention of AICD based on the following observations. In mammalian cultured cells, *X11* overexpression can reduce nuclear localization of the AICD with Tip60 [69]. Moreover, X11 can shuttle between the nucleus and cytoplasm to regulate AICD transcriptional targets [70]. Our functional studies using AICDREP suggest that the PTB domain of X11L is essential for X11L's ability to regulate AICD. Therefore, our hypothesis is that *X11L*

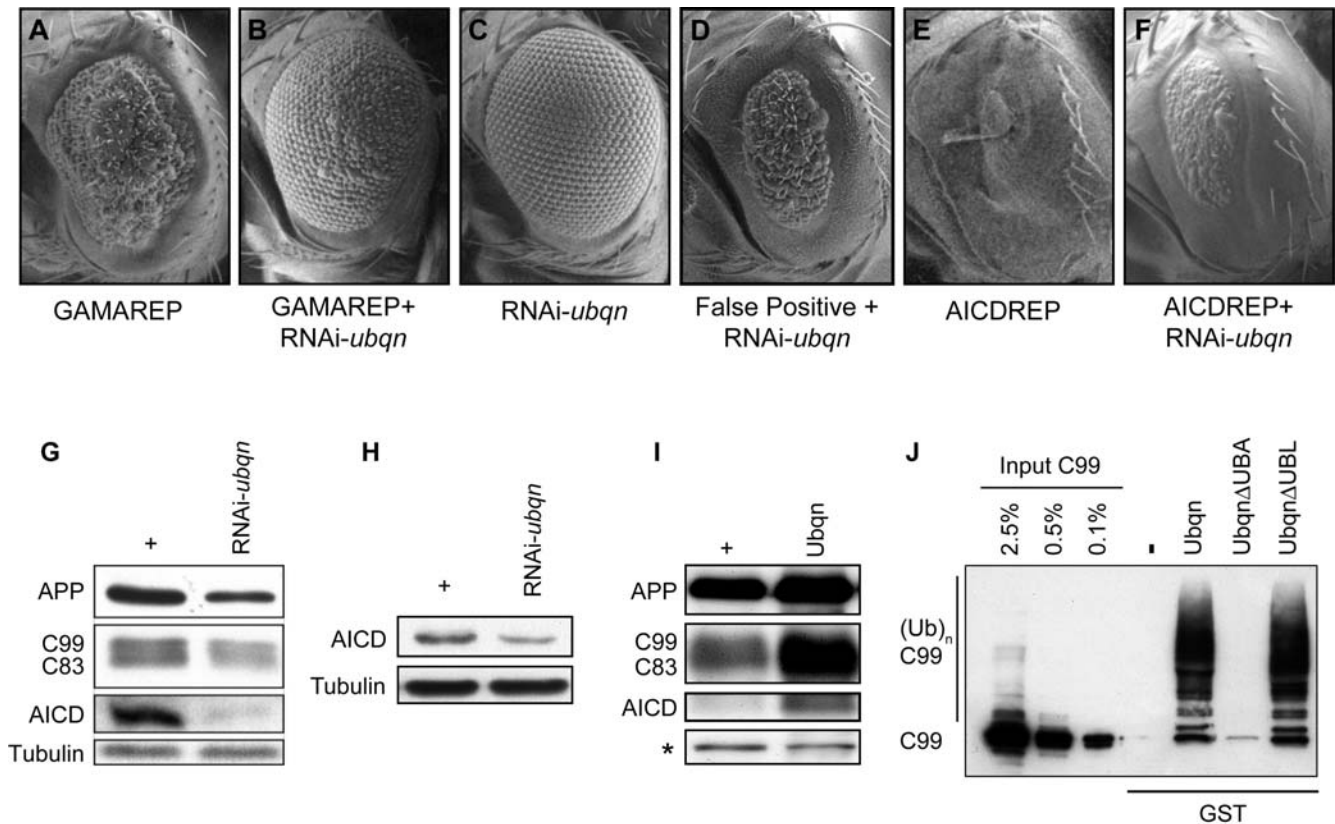

**Figure 6. Ubqn binds to APP via its UBA domain and modulates APP levels.** (A–F) SEMs of adult fly eyes of various genotypes. Eye-specific *ubqn* knockdown by itself does not show any visible phenotypes (C). However, silencing of *ubqn* strongly suppresses the GAMAREP phenotypes (compare B to A). *ubqn* knockdown does not modify the eye phenotype of the false positive reporter (GMR-Gal4, UAS-*grim/reaper*) (see Fig. 2D). (D). Eye-specific silencing of *ubqn* modestly suppresses the eye phenotype of AICDREP (compare F to E). (G–I) Western blotting of adult head lysates. (G) Eye-specific silencing of *ubqn* leads to decreased levels of APP, CTFs and AICD. (H) *ubqn* knockdown results in decreased AICD-Myc levels. (I) Eye-specific overexpression of *ubqn* results in an increase in the levels of APP, the CTFs and AICD. A non-specific band (marked by an asterisk) serves as the loading control. (J) GST pull-down assay. The input lanes show C99 levels from 0.1 to 2.5% of the S2 cell lysates used for each pull-down. Compared with control (GST alone), Ubqn and Ubqn $\Delta$ UBL, but not Ubqn $\Delta$ UBA, binds to C99. In addition, Ubqn and Ubqn $\Delta$ UBL show similar binding to C99, as well as to higher molecular weight products that are likely polyubiquitinated forms of C99. doi:10.1371/journal.pone.0002495.g006

overexpression leads to the cytoplasmic retention of AICD via a direct physical interaction between the PTB domain of X11L and AICD.

We have also showed that, in contrast to prior studies [36], *X11L* overexpression does not inhibit  $\gamma$ -secretase activity in vivo. In *Drosophila*, none of the APP cleavage products, C83, C99 or AICD, is affected by *X11L* overexpression. Moreover, *X11L* overexpression does not inhibit  $\gamma$ -secretase activity in vivo towards another key substrate, Notch, at the level of cleavage, or at the level of genetic interaction with *psn*. In a prior study, King et al concluded that X11 inhibits  $\gamma$ -secretase activity, based largely on the findings that extracellular A $\beta$  levels were decreased upon *X11* overexpression [36]. They interpreted this to be due to decreased A $\beta$  production by  $\gamma$ -secretase inhibition. However, decreased extracellular A $\beta$  levels could also result from decreased A $\beta$  secretion or increased A $\beta$  degradation. In fact, another in vivo study suggested that although *X11* overexpression led to reduced A $\beta$  levels, levels of C83 and C99 (direct  $\gamma$ -secretase substrates) did not increase [29]. Since overexpression of *X11* can increase the steady-state levels of APP, likely by modulating APP trafficking to certain compartments in the secretory pathway [25,27,33,34], an alternative interpretation of work by King et al is that *X11* overexpression decreases A $\beta$  via its modulation of APP trafficking,

rather than by regulating  $\gamma$ -secretase cleavage. Therefore, these prior studies are, in fact, consistent with our data and interpretation.

Our data also suggest that the predominant function of *ubqn* is to regulate APP levels, not  $\gamma$ -secretase activity. We have established that Ubqn can bind to and stabilize APP. In contrast to the selective reduction of AICD and increase in CTFs seen following the knockdown of any one of the four  $\gamma$ -secretase components, both *ubqn* loss-of-function and *ubqn* overexpression modify the levels of APP and its cleavage fragments largely in proportion. Our results are consistent with findings made by Zhang et al and different from Hiltunen et al; possible reasons for these differences are discussed in Zhang et al [50].

In this study, we did not observe any alterations in  $\gamma$ -secretase activity on APP in response to the silencing of *ubqn* or *ubqn* overexpression, similar to observations made by others [48–50]. However, we have previously shown that Ubqn binds to Psn and antagonizes *psn* function both during development and during adult-onset eye neurodegeneration in *Drosophila* [47]. There are several ways these observations can be reconciled.  $\gamma$ -secretase activity is known to vary depending upon the substrate and the tissue in which it acts [71]. It is possible that *ubqn* antagonizes *psn* activity such that its effect on  $\gamma$ -secretase is more evident on



substrates other than APP in the eye. As a result, the modification of the  $\gamma$ -cleavage of APP by *ubqn*, if any, might be below the detection limits of our assay. Alternatively, it is well established that in addition to being the catalytic core of the  $\gamma$ -secretase complex, Psn can also function in a  $\gamma$ -secretase independent fashion [72,73]. Therefore, it is possible that *ubqn* primarily inhibits  $\gamma$ -secretase independent functions of *psn*, leaving  $\gamma$ -secretase dependent activity largely intact. In either case, the primary effect of *ubqn* on APP appears to be the regulation of APP steady state levels, and not inhibition of the  $\gamma$ -cleavage of APP.

Here, using GAMAREP and AICDREP, in conjunction with *in vivo* cleavage analysis, we have identified factors that regulate APP. Further screens using these tools are likely to identify other proteins which may have implications for AD pathogenesis. Since increased expression of X11 attenuates A $\beta$  production or secretion in APP transgenic mice [28,29], but does not act on  $\gamma$ -secretase directly (this work), X11 may present an attractive therapeutic target for AD. Similarly, since reduced Ubqn levels result in a modest decrease in APP levels, whereas expression of both human wildtype and the AD variant of UBQLN1 leads to adult onset, age-dependent eye degeneration in *Drosophila* [47], UBQLN1 may also be considered as a possible drug target for AD.

## Materials and Methods

### Molecular Biology

A microRNA-based technology [74] was used for RNAi silencing. To silence *psn*, *nct*, *aph-1* and *pen-2*, the respective coding regions were independently targeted. PCR products of these microRNA precursors were cloned into pGMR. To generate GMR-*X11L* and UAS-*X11L*, the *X11L* coding sequence was PCR amplified from the EST clone, LD29081, and subcloned into each vector. To generate GMR-human-*X11 $\alpha$* , a clone of *X11 $\alpha$*  (kindly provided by Declan McLoughlin) was subcloned into the EcoRI and NotI sites of pGMR. To generate GMR-*X11 $\Delta$ PTB*, the insert of UAS-*X11 $\Delta$ PTB* [75] was subcloned into pGMR vector. To generate GMR-AICD-Gal4, the nucleotide region encoding the predicted human AICD fragment was PCR amplified and fused in-frame, upstream of an *S. cerevisiae* Gal4 sequence. To make GMR-*ubqn*, GMR-RNAi-*ubqn*CDS and GMR-RNAi-*ubqn*UTR, the inserts from UAS-*ubqn*, UAS-RNAi-*ubqn*CDS and UAS-RNAi-*ubqn*UTR [47] were subcloned into pGMR vector, respectively. To generate pGMR-APP-9Myc and GMR-AICD-9Myc, coding sequence of APP<sub>695</sub> or AICD was PCR amplified and cloned in-frame upstream of a 9xMyc sequences that has been previously subcloned into pGMR vector. C99-9Myc was also generated by PCR and subcloned to generate pMT-C99-9Myc and GMR-C99-9Myc, respectively. To make pGEX-Ubqn $\Delta$ UBL, a PCR fragment encoding Ubqn $\Delta$ UBL was subcloned into the EcoRI and NotI sites of the modified pGEX4T-1 vector. pGEX-*Ubqn* and pGEX-*Ubqn* $\Delta$ UBA, were described previously [47]. All cloned PCR products were confirmed by DNA sequencing.

### *Drosophila* Genetics and Strains

For the X chromosome EP screen, individual lines of females carrying a single inserted EP element were individually crossed to GAMAREP males. Progeny carrying one copy of an EP insertion and one copy of GAMAREP were examined, and their eye size compared with control flies derived from a cross of *w<sup>1118</sup>* females to GAMAREP males. For experiments involving transgenic flies, multiple independent fly lines were generated (Rainbow Transgenic Flies) and tested for each transgene. UAS-*BACE* flies [60] were obtained from Rita Reifgerste via Doris Kretzschmar, and

UAS-*hid* flies [64] were obtained from Bruce Hay. GMR-Psn<sup>D257A</sup> was described previously [59].

### Scanning Electron Microscopy

Freshly sacrificed flies were mounted on their side with one eye upward on white tape using clear nail polish. All flies were placed on a rotating platform to permit for orientation under vacuum and were imaged at 180 $\times$  magnification and 100 psi using a Hitachi 2460N scanning electron microscope. Analysis of eye phenotypes was performed as described previously [59].

### Antibody Generation

A fusion of GST-TEV to *Drosophila* X11L residues 452–775, corresponding to a region within the N-terminal domain, with an intervening TEV protease recognition site, was purified from *E. coli* lysates. Glutathione agarose-retained proteins were cleaved by TEV protease to remove GST, and used to immunize rabbits (Imgenex).

### Lysate Preparation and Western Blotting

Heads from age and sex-matched adults were disrupted in lysis buffer, complete protease inhibitor cocktail (Roche) using a sonicator-3000 from MISONIX. Samples were sonicated. Samples were boiled, centrifuged, and total protein from 4 heads per genotype was analyzed by Western blotting. Antibodies used were anti-Myc (Upstate), anti-Ubqn [47], anti-X11L and anti-Tubulin (Sigma).

### S2 Cell Culture and Transfection

S2 cells were grown in Schneider's *Drosophila* medium (Invitrogen) supplemented with 10% FBS, 50 units/ml penicillin, and 50  $\mu$ g/ml streptomycin at room temperature. Transfections were carried out using MaxFect transfection reagent (Molecular). Typically, 1.5 $\times$ 10<sup>6</sup> cells plated in a 12-well dish were transfected with 0.7 – 1  $\mu$ g total plasmid DNA plus 5  $\mu$ L MaxFect reagent. Metallothionein promoter expression was induced with 0.5 mM copper sulfate 24 hours after transfection. S2 cell lysates were prepared by harvesting transfected cells ( $\sim$ 5 $\times$ 10<sup>6</sup>) in 1 mL lysis buffer, followed by incubation on ice for 10 minutes and centrifugation (16,000 $\times$ g, 10 min) to pellet insoluble debris.

### GST Pulldown Assay

10  $\mu$ g GST fusion proteins purified from *E. coli* lysates were retained on 15  $\mu$ L glutathione beads, and mixed with 400  $\mu$ g S2 cell lysate in 1mL total volume. Retained proteins were eluted by boiling in Laemmli sample buffer, and detected by Western blotting with anti-Myc antibody (Covance) [47].

### Supporting Information

**Figure S1** The expression levels of X11L and *ubqn* transgenes. (A) We have generated polyclonal antibodies against X11L. X11L overexpression is accomplished using either an eye-specific promoter (GMR-X11L) or the eye-specific driver using the UAS-GAL4 system (GMR-Gal4, UAS-X11L). Western blots of lysates from fly heads overexpressing X11L or lysates from Schneider 2 cells overexpressing X11L (MT-X11L) reveal a band of predicted size using anti-X11L antibodies. (B) Western blots of lysates from fly heads expressing RNAi-*ubqn* or *ubqn* using anti-Ubqn antibodies. Silencing of *ubqn* significantly reduces Ubqn levels, while *ubqn* overexpression increases Ubqn levels. A non-specific band (\*) serves as protein loading control. Found at: doi:10.1371/journal.pone.0002495.s001 (1.06 MB TIF)

## Acknowledgments

We thank Hao Zhao for generating several crucial transgenic flies, Declan McLoughlin for human X11 $\alpha$  cDNA, Vivian Budnik X11 $\Delta$ PTB DNA, Bruce Hay, Rita Reifegerste and Doris Kretzschmar for fly stocks and DNA, Larry Zipursky for allowing us to use his sonicator, B. Hay for comments on the manuscript, and the Guo lab members for discussions.

## References

- Selkoe DJ (2001) Alzheimer's disease: genes, proteins, and therapy. *Physiol Rev* 81: 741–766.
- Edbauer D, Winkler E, Regula JT, Pesold B, Steiner H, et al. (2003) Reconstitution of gamma-secretase activity. *Nat Cell Biol* 5: 486–488.
- Iwatsubo T (2004) The gamma-secretase complex: machinery for intramembrane proteolysis. *Curr Opin Neurobiol* 14: 379–383.
- Goate A, Chartier-Harlin MC, Mullan M, Brown J, Crawford F, et al. (1991) Segregation of a missense mutation in the amyloid precursor protein gene with familial Alzheimer's disease. *Nature* 349: 704–706.
- Levy-Lahad E, Wasco W, Poorkaj P, Romano DM, Oshima J, et al. (1995) Candidate gene for the chromosome 1 familial Alzheimer's disease locus. *Science* 269: 973–977.
- Rogaev EI, Sherrington R, Rogaeva EA, Levesque G, Ikeda M, et al. (1995) Familial Alzheimer's disease in kindreds with missense mutations in a gene on chromosome 1 related to the Alzheimer's disease type 3 gene. *Nature* 376: 775–778.
- Sherrington R, Rogaev EI, Liang Y, Rogaeva EA, Levesque G, et al. (1995) Cloning of a gene bearing missense mutations in early-onset familial Alzheimer's disease. *Nature* 375: 754–760.
- Rovelet-Lecrux A, Hannequin D, Raux G, Le Meur N, Laquerriere A, et al. (2006) APP locus duplication causes autosomal dominant early-onset Alzheimer disease with cerebral amyloid angiopathy. *Nat Genet* 38: 24–26.
- Theuns J, Brouwers N, Engelborghs S, Sleegers K, Bogaerts V, et al. (2006) Promoter mutations that increase amyloid precursor-protein expression are associated with Alzheimer disease. *Am J Hum Genet* 78: 936–946.
- Cao X, Sudhof TC (2001) A transcriptionally [correction of transcriptively] active complex of APP with Fe65 and histone acetyltransferase Tip60. *Science* 293: 115–120.
- Pardossi-Piquard R, Petit A, Kawarai T, Sunyach C, Alves da Costa C, et al. (2005) Presenilin-dependent transcriptional control of the Abeta-degrading enzyme neprilysin by intracellular domains of betaAPP and APLP. *Neuron* 46: 541–554.
- Ryan KA, Pimplikar SW (2005) Activation of GSK-3 and phosphorylation of CRMP2 in transgenic mice expressing APP intracellular domain. *J Cell Biol* 171: 327–335.
- Zhang YW, Wang R, Liu Q, Zhang H, Liao FF, et al. (2007) Presenilin/gamma-secretase-dependent processing of beta-amyloid precursor protein regulates EGF receptor expression. *Proc Natl Acad Sci U S A* 104: 10613–10618.
- Galvan V, Gorostiza OF, Banwait S, Ataie M, Logvinova AV, et al. (2006) Reversal of Alzheimer's-like pathology and behavior in human APP transgenic mice by mutation of Asp664. *Proc Natl Acad Sci U S A* 103: 7130–7135.
- Alves da Costa C, Sunyach C, Pardossi-Piquard R, Sevalle J, Vincent B, et al. (2006) Presenilin-dependent gamma-secretase-mediated control of p53-associated cell death in Alzheimer's disease. *J Neurosci* 26: 6377–6385.
- Muller T, Concannon CG, Ward MW, Walsh CM, Tirniceriu AL, et al. (2007) Modulation of gene expression and cytoskeletal dynamics by the amyloid precursor protein intracellular domain (AICD). *Mol Biol Cell* 18: 201–210.
- Kimberly WT, Zheng JB, Guenette SY, Selkoe DJ (2001) The intracellular domain of the beta-amyloid precursor protein is stabilized by Fe65 and translocates to the nucleus in a notch-like manner. *J Biol Chem* 276: 40288–40292.
- Roncarati R, Sestan N, Scheinfeld MH, Berechid BE, Lopez PA, et al. (2002) The gamma-secretase-generated intracellular domain of beta-amyloid precursor protein binds Numb and inhibits Notch signaling. *Proc Natl Acad Sci U S A* 99: 7102–7107.
- Kim HS, Kim EM, Lee JP, Park CH, Kim S, et al. (2003) C-terminal fragments of amyloid precursor protein exert neurotoxicity by inducing glycogen synthase kinase-3beta expression. *Faseb J* 17: 1951–1953.
- Hoareau C, Borrell V, Soriano E, Krebs MO, Prochiantz A, et al. (2008) Amyloid precursor protein cytoplasmic domain antagonizes reelin neurite outgrowth inhibition of hippocampal neurons. *Neurobiol Aging* 29: 542–553.
- Hamid R, Kilger E, Willem M, Vassallo N, Kostka M, et al. (2007) Amyloid precursor protein intracellular domain modulates cellular calcium homeostasis and ATP content. *J Neurochem* 102: 1264–1275.
- Rogelj B, Mitchell JC, Miller CC, McLoughlin DM (2006) The X11/Mint family of adaptor proteins. *Brain Res Rev* 52: 305–315.
- McLoughlin DM, Irving NG, Brownlee J, Brion JP, Leroy K, et al. (1999) Mint2/X11-like colocalizes with the Alzheimer's disease amyloid precursor protein and is associated with neuritic plaques in Alzheimer's disease. *Eur J Neurosci* 11: 1988–1994.
- Jacobs EJ, Williams RJ, Francis PT (2006) Cyclin-dependent kinase 5, Munc 18a and Munc 18-interacting protein 1/X11alpha protein upregulation in Alzheimer's disease. *Neuroscience* 138: 511–522.

## Author Contributions

Conceived and designed the experiments: MG GG RF AG. Performed the experiments: MG GG RF AG. Analyzed the data: MG GG RF AG. Contributed reagents/materials/analysis tools: JW HY. Wrote the paper: MG.

- Borg JP, Yang Y, De Taddeo-Borg M, Margolis B, Turner RS (1998) The X11alpha protein slows cellular amyloid precursor protein processing and reduces Abeta40 and Abeta42 secretion. *J Biol Chem* 273: 14761–14766.
- Tomita S, Ozaki T, Taru H, Oguchi S, Takeda S, et al. (1999) Interaction of a neuron-specific protein containing PDZ domains with Alzheimer's amyloid precursor protein. *J Biol Chem* 274: 2243–2254.
- Sastre M, Turner RS, Levy E (1998) X11 interaction with beta-amyloid precursor protein modulates its cellular stabilization and reduces amyloid beta-protein secretion. *J Biol Chem* 273: 22351–22357.
- Lee JH, Lau KF, Perkinton MS, Standen CL, Shemilt SJ, et al. (2003) The neuronal adaptor protein X11alpha reduces Abeta levels in the brains of Alzheimer's APP<sup>swe</sup> Tg2576 transgenic mice. *J Biol Chem* 278: 47025–47029.
- Lee JH, Lau KF, Perkinton MS, Standen CL, Rogelj B, et al. (2004) The neuronal adaptor protein X11beta reduces amyloid beta protein levels and amyloid plaques formation in the brains of transgenic mice. *J Biol Chem* 279: 49099–49104.
- Borg JP, Ooi J, Levy E, Margolis B (1996) The phosphotyrosine interaction domains of X11 and FE65 bind to distinct sites on the YENPTY motif of amyloid precursor protein. *Mol Cell Biol* 16: 6229–6241.
- McLoughlin DM, Miller CC (1996) The intracellular cytoplasmic domain of the Alzheimer's disease amyloid precursor protein interacts with phosphotyrosine-binding domain proteins in the yeast two-hybrid system. *FEBS Lett* 397: 197–200.
- Biederer T, Cao X, Sudhof TC, Liu X (2002) Regulation of APP-dependent transcription complexes by Mint/X11s: differential functions of Mint isoforms. *J Neurosci* 22: 7340–7351.
- King GD, Perez RG, Steinhilb ML, Gaut JR, Turner RS (2003) X11alpha modulates secretory and endocytic trafficking and metabolism of amyloid precursor protein: mutational analysis of the YENPTY sequence. *Neuroscience* 120: 143–154.
- Araki Y, Tomita S, Yamaguchi H, Miyagi N, Sumioka A, et al. (2003) Novel cadherin-related membrane proteins, Alcadeins, enhance the X11-like protein-mediated stabilization of amyloid beta-protein precursor metabolism. *J Biol Chem* 278: 49448–49458.
- Lau KF, McLoughlin DM, Standen C, Miller CC (2000) X11 alpha and x11 beta interact with presenilin-1 via their PDZ domains. *Mol Cell Neurosci* 16: 557–565.
- King GD, Cherian K, Turner RS (2004) X11alpha impairs gamma- but not beta-cleavage of amyloid precursor protein. *J Neurochem* 88: 971–982.
- Mah AL, Perry G, Smith MA, Monteiro MJ (2000) Identification of ubiquitin, a novel presenilin interactor that increases presenilin protein accumulation. *J Cell Biol* 151: 847–862.
- Davidson JD, Riley B, Burright EN, Duvick LA, Zoghbi HY, et al. (2000) Identification and characterization of an ataxin-1-interacting protein: A1Up, a ubiquitin-like nuclear protein. *Hum Mol Genet* 9: 2305–2312.
- Blacker D, Bertram L, Saunders AJ, Moscarillo TJ, Albert MS, et al. (2003) Results of a high-resolution genome screen of 437 Alzheimer's disease families. *Hum Mol Genet* 12: 23–32.
- Myers A, Wavrant De-Vrieze F, Holmans P, Hamshere M, Crook R, et al. (2002) Full genome screen for Alzheimer disease: stage II analysis. *Am J Med Genet* 114: 235–244.
- Bertram L, Hiltunen M, Parkinson M, Ingelsson M, Lange C, et al. (2005) Family-based association between Alzheimer's disease and variants in UBQLN1. *N Engl J Med* 352: 884–894.
- Kamboh MI, Minster RL, Feingold E, DeKosky ST (2006) Genetic association of ubiquitin with Alzheimer's disease and related quantitative measures. *Mol Psychiatry* 11: 273–279.
- Slifer MA, Martin ER, Bronson PG, Browning-Large C, Doraiswamy PM, et al. (2006) Lack of association between UBQLN1 and Alzheimer disease. *Am J Med Genet Neuropsychiatr* 141: 208–213.
- Smemo S, Nowotny P, Hinrichs AL, Kauwe JS, Cherny S, et al. (2006) Ubiquitin 1 polymorphisms are not associated with late-onset Alzheimer's disease. *Ann Neurol* 59: 21–26.
- Brouwers N, Sleegers K, Engelborghs S, Bogaerts V, van Duijn CM, et al. (2006) The UBQLN1 polymorphism, UBQ-8i, at 9q22 is not associated with Alzheimer's disease with onset before 70 years. *Neurosci Lett* 392: 72–74.
- Bensemain F, Chapuis J, Tian J, Shi J, Thaker U, et al. (2006) Association study of the Ubiquitin gene with Alzheimer's disease. *Neurobiol Dis* 22: 691–693.
- Ganguly A, Feldman RM, Guo M (2008) ubiquitin antagonizes presenilin and promotes neurodegeneration in Drosophila. *Hum Mol Genet* 17: 293–302.
- Li A, Xie Z, Dong Y, McKay KM, McKee ML, et al. (2007) Isolation and characterization of the Drosophila ubiquitin ortholog dUbqln: In vivo

- interaction with early-onset Alzheimer disease genes. *Hum Mol Genet* 16: 2626–2639.
49. Hiltunen M, Lu A, Thomas AV, Romano DM, Kim M, et al. (2006) Ubiquitin 1 modulates amyloid precursor protein trafficking and abeta secretion. *J Biol Chem* 281: 32240–32253.
  50. Zhang C, Khandelwal PJ, Chakraborty R, Cuellar TL, Sarangi S, et al. (2007) An AICD-based functional screen to identify APP metabolism regulators. *Mol Neurodegener* 2: 15.
  51. Marsh JL, Thompson LM (2006) *Drosophila* in the study of neurodegenerative disease. *Neuron* 52: 169–178.
  52. Sang TK, Jackson GR (2005) *Drosophila* models of neurodegenerative disease. *NeuroRx* 2: 438–446.
  53. Clark IE, Dodson MW, Jiang C, Cao JH, Huh JR, et al. (2006) *Drosophila* pink1 is required for mitochondrial function and interacts genetically with parkin. *Nature* 441: 1162–1166.
  54. Dodson MW, Guo M (2007) Pink1, Parkin, DJ-1 and mitochondrial dysfunction in Parkinson's disease. *Curr Opin Neurobiol* 17: 331–337.
  55. Luo LQ, Martin-Morris LE, White K (1990) Identification, secretion, and neural expression of APPL, a *Drosophila* protein similar to human amyloid protein precursor. *J Neurosci* 10: 3849–3861.
  56. Hu Y, Fortini ME (2003) Different cofactor activities in gamma-secretase assembly: evidence for a nicastrin-Aph-1 subcomplex. *J Cell Biol* 161: 685–690.
  57. Takasugi N, Tomita T, Hayashi I, Tsuruoka M, Niimura M, et al. (2003) The role of presenilin cofactors in the gamma-secretase complex. *Nature* 422: 438–441.
  58. Fossgreen A, Bruckner B, Czech C, Masters CL, Beyreuther K, et al. (1998) Transgenic *Drosophila* expressing human amyloid precursor protein show gamma-secretase activity and a blistered-wing phenotype. *Proc Natl Acad Sci U S A* 95: 13703–13708.
  59. Guo M, Hong EJ, Fernandes J, Zipursky SL, Hay BA (2003) A reporter for amyloid precursor protein gamma-secretase activity in *Drosophila*. *Hum Mol Genet* 12: 2669–2678.
  60. Greeve I, Kretschmar D, Tschape JA, Beyn A, Brellinger C, et al. (2004) Age-dependent neurodegeneration and Alzheimer-amyloid plaque formation in transgenic *Drosophila*. *J Neurosci* 24: 3899–3906.
  61. Hase M, Yagi Y, Taru H, Tomita S, Sumioka A, et al. (2002) Expression and characterization of the *Drosophila* X11-like/Mint protein during neural development. *J Neurochem* 81: 1223–1232.
  62. Hay BA, Huh JR, Guo M (2004) The genetics of cell death: approaches, insights and opportunities in *Drosophila*. *Nat Rev Genet* 5: 911–922.
  63. Hay BA, Guo M (2006) Caspase-Dependent Cell Death in *Drosophila*. *Annu Rev Cell Dev Biol* 22: 623–650.
  64. Yoo SJ, Huh JR, Muro I, Yu H, Wang L, et al. (2002) Hid, Rpr and Grim negatively regulate DIAP1 levels through distinct mechanisms. *Nat Cell Biol* 4: 416–424.
  65. Artavanis-Tsakonas S, Rand MD, Lake RJ (1999) Notch signaling: cell fate control and signal integration in development. *Science* 284: 770–776.
  66. Guo M, Jan LY, Jan YN (1996) Control of daughter cell fates during asymmetric division: interaction of Numb and Notch. *Neuron* 17: 27–41.
  67. Bray SJ (2006) Notch signalling: a simple pathway becomes complex. *Nat Rev Mol Cell Biol* 7: 678–689.
  68. Cagan RL, Ready DF (1989) Notch is required for successive cell decisions in the developing *Drosophila* retina. *Genes Dev* 3: 1099–1112.
  69. von Rotz RC, Kohli BM, Bosset J, Meier M, Suzuki T, et al. (2004) The APP intracellular domain forms nuclear multiprotein complexes and regulates the transcription of its own precursor. *J Cell Sci* 117: 4435–4448.
  70. Sumioka A, Saito Y, Sakuma M, Araki Y, Yamamoto T, et al. (2008) The X11L/X11beta/MINT2 and X11L2/X11gamma/MINT3 scaffold proteins shuttle between the nucleus and cytoplasm. *Exp Cell Res* 314: 1155–1162.
  71. Loewer A, Soba P, Beyreuther K, Paro R, Merdes G (2004) Cell-type-specific processing of the amyloid precursor protein by Presenilin during *Drosophila* development. *EMBO Rep* 5: 405–411.
  72. Parks AL, Curtis D (2007) Presenilin diversifies its portfolio. *Trends Genet* 23: 140–150.
  73. Vetrivel KS, Zhang YW, Xu H, Thinakaran G (2006) Pathological and physiological functions of presenilins. *Mol Neurodegener* 1: 4.
  74. Chen CH, Huang H, Ward CM, Su JT, Schaeffer LV, et al. (2007) A Synthetic Maternal-Effect Selfish Genetic Element Drives Population Replacement in *Drosophila*. *Science* 316: 597–600.
  75. Ashley J, Packard M, Ataman B, Budnik V (2005) Fasciclin II signals new synapse formation through amyloid precursor protein and the scaffolding protein dX11/Mint. *J Neurosci* 25: 5943–5955.
  76. Vishnu S, Hertenstein A, Betschinger J, Knoblich JA, Gert de Couet H, et al. (2006) The adaptor protein X11Lalpha/Dmint1 interacts with the PDZ-binding domain of the cell recognition protein Rst in *Drosophila*. *Dev Biol* 289: 296–307.
